# Supplementary material for: Age at natural menopause and risk of incident cardiovascular disease: a pooled analysis of individual patient data
Source: PubMed Central journal article supplement — Lancet Public Health. 2019 Oct 3;4(11):e553–64. doi: 10.1016/S2468-2667(19)30155-0 (PMC7118366; doi:10.1016/s2468-2667(19)30155-0), 2019-10-03
Supplement: mmc1.pdf [file mmc1.pdf]

# THE LANCET

## Public Health

### **Supplementary appendix**

This appendix formed part of the original submission and has been peer reviewed. We post it as supplied by the authors.

Supplement to: Zhu D, Chung H-F, Dobson AJ, et al. Age at natural menopause and risk of incident cardiovascular disease: a pooled analysis of individual patient data. *Lancet Public Health* 2019; published online Oct 3. [https://doi.org/10.1016/S2468-2667\(19\)30155-0](https://doi.org/10.1016/S2468-2667(19)30155-0).

## Appendix 1. Characteristics of individual studies in the InterLACE consortium

| Study                                                   | Country     | N       | Age at baseline (years), Mean (SD), | Age at last follow-up (years), Mean (SD) | Women's year of birth |         |         |       |
|---------------------------------------------------------|-------------|---------|-------------------------------------|------------------------------------------|-----------------------|---------|---------|-------|
|                                                         |             |         |                                     |                                          | <1930                 | 1930-39 | 1940-49 | 1950+ |
| Australian Longitudinal Study on Women's Health (ALSWH) | Australia   | 7316    | 47.6 (1.4)                          | 63.1 (3.4)                               | .                     | .       | 74.9    | 25.1  |
| Healthy Ageing of Women Study (HOW)                     | Australia   | 306     | 54.8 (2.8)                          | 62.6 (3.9)                               | .                     | .       | 86.6    | 13.4  |
| Melbourne Collaborative Cohort Study (MCCS)             | Australia   | 12 276  | 58.1 (7.5)                          | 67.9 (7.7)                               | 33.8                  | 41.8    | 20.8    | 3.6   |
| Danish Nurse Cohort Study (DNC)                         | Scandinavia | 9128    | 59.4 (7.9)                          | 70.1 (9.2)                               | 28.9                  | 50.2    | 20.9    | 0.0   |
| Women's Lifestyle and Health Study (WLH)                | Scandinavia | 23 110  | 40.0 (5.8)                          | 51.1 (5.9)                               | .                     | .       | 37.3    | 62.7  |
| Hilo Women's Healthy Study (HILO)                       | USA         | 643     | 50.7 (6.2)                          | 50.7 (6.2)                               | .                     | 0.2     | 24.4    | 75.4  |
| Study of Women's Health Across the Nation (SWAN)        | USA         | 2209    | 46 (2.7)                            | 55.9 (2.7)                               | .                     | .       | 42.6    | 57.4  |
| Japan Nurses' Health Study (JNHS)                       | Japan       | 42 917  | 41.9 (7.8)                          | 41.9 (7.8)                               | .                     | 0.2     | 9.31    | 90.5  |
| MRC National Survey of Health and Development (NSHD)*   | UK          | 710     | 47.0                                | 54.1 (1.1)                               | .                     | .       | 100.0   | .     |
| National Child Development Study (NCDS)*                | UK          | 2905    | 50.0                                | 54.7 (1.2)                               | .                     | .       | .       | 100.0 |
| English Longitudinal Study of Ageing (ELSA)             | UK          | 1781    | 59.6 (10)                           | 71 (9.7)                                 | 22.4                  | 28.1    | 36.4    | 13.1  |
| UK Women's Cohort Study (UKWCS)                         | UK          | 11 105  | 53.4 (9.3)                          | 56.7 (8.9)                               | 8.8                   | 28.9    | 34.3    | 28.1  |
| Whitehall II study (WHITEHALL II)                       | UK          | 1695    | 45.9 (6.2)                          | 63.7 (6.5)                               | 0.1                   | 47.3    | 42.4    | 10.2  |
| Southall And Brent REvisited (SABRE)                    | UK          | 592     | 53.7 (6.7)                          | 60.5 (11.8)                              | 15.0                  | 50.5    | 33.1    | 1.4   |
| UK Biobank (UK Biobank)                                 | UK          | 184 745 | 55.7 (8)                            | 56.2 (8.1)                               | .                     | 2.9     | 39.6    | 57.5  |
| All                                                     |             | 301 438 | 52.3 (9.9)                          | 57.0 (10.3)                              | 2.7                   | 6.6     | 34.6    | 56.1  |

\* NSHD (1946 British Birth Cohort) and NCDS (1958 British Birth Cohort) first collected information on women's health in 1993 (aged 47) and 2008 (aged 50), respectively, so we used 1993 and 2008 as the baseline year for the InterLACE.

Abbreviations: InterLACE, International Collaboration for a Life Course Approach to Reproductive Health and Chronic Disease Events; SD, standard deviation.

**Appendix 1 (Continued). Characteristics of individual studies in the InterLACE consortium**

| Study                                                   | Country     | Baseline survey year | Last survey year used | Number of CVD events | Person-years | Incidence rate (%) | Average age at natural menopause, mean (SD) | Average age at natural menopause, median (Q1, Q3) |
|---------------------------------------------------------|-------------|----------------------|-----------------------|----------------------|--------------|--------------------|---------------------------------------------|---------------------------------------------------|
| Australian Longitudinal Study on Women's Health (ALSWH) | Australia   | 1996                 | 2013                  | 826                  | 214672.7     | 3.8                | 50.9 (4.3)                                  | 51 (49, 54)                                       |
| Healthy Ageing of Women Study (HOW)                     | Australia   | 2001                 | 2011                  | 29                   | 8929.5       | 3.2                | 50.5 (4.4)                                  | 50 (48, 54)                                       |
| Melbourne Collaborative Cohort Study (MCCS)             | Australia   | 1990-1994            | 2003-2006             | 1401                 | 413275.6     | 3.4                | 49.7 (4.5)                                  | 50 (47, 53)                                       |
| Danish Nurse Cohort Study (DNC)                         | Scandinavia | 1993                 | 1999                  | 1374                 | 334386.0     | 4.1                | 49.4 (3.7)                                  | 50 (48, 52)                                       |
| Women's Lifestyle and Health Study (WLH)                | Scandinavia | 1991-1992            | 2003-2004             | 1163                 | 412579.0     | 2.8                | 50.2 (3.8)                                  | 50 (48, 53)                                       |
| Hilo Women's Healthy Study (HILO)                       | USA         | 2004-2005            | 2005                  | 35                   | 11392.3      | 3.1                | 49.2 (4.3)                                  | 50 (47.5, 52)                                     |
| Study of Women's Health Across the Nation (SWAN)        | USA         | 1996                 | 2006                  | 163                  | 47015.0      | 3.5                | 51 (2.6)                                    | 51 (49, 53)                                       |
| Japan Nurses' Health Study (JNHS)                       | Japan       | 2001-2007            | 2007                  | 380                  | 379005.0     | 1.0                | 49.8 (3.5)                                  | 50 (48, 52)                                       |
| MRC National Survey of Health and Development (NSHD)*   | UK          | 1993                 | 2000                  | 87                   | 15410.9      | 5.6                | 50.7 (3.4)                                  | 51.1 (49.2, 52.9)                                 |
| National Child Development Study (NCDS)*                | UK          | 2008                 | 2013                  | 19                   | 7539.0       | 2.5                | 48.8 (3.9)                                  | 49 (47, 52)                                       |
| English Longitudinal Study of Ageing (ELSA)             | UK          | 2002                 | 2010-2011             | 500                  | 62883.0      | 8.0                | 49.9 (5)                                    | 50 (48, 53)                                       |
| UK Women's Cohort Study (UKWCS)                         | UK          | 1995-1998            | 1999-2004             | 481                  | 264770.5     | 1.8                | 49.3 (4.6)                                  | 50 (47, 52)                                       |
| Whitehall II study (WHITEHALL II)                       | UK          | 1985-1988            | 2006                  | 321                  | 48323.7      | 6.6                | 50.1 (4)                                    | 50 (48, 53)                                       |
| Southall And Brent REvisited (SABRE)                    | UK          | 1988-1991            | 2008-2012             | 136                  | 15931.0      | 8.5                | 48.9 (4.6)                                  | 50 (47, 52)                                       |
| UK Biobank (UK Biobank)                                 | UK          | 2006-2010            | 2013 <sup>†</sup>     | 7339                 | 4303440.0    | 1.7                | 50.4 (4.3)                                  | 51 (48, 53)                                       |
| All                                                     |             |                      |                       | 14254                | 6539553.2    | 2.2                | 50.2 (4.3)                                  | 50 (48, 53)                                       |

\* NSHD (1946 British Birth Cohort) and NCDS (1958 British Birth Cohort) first collected information on women's health in 1993 (aged 47) and 2008 (aged 50), respectively, so we used 1993 and 2008 as the baseline year for the InterLACE.

Abbreviations: InterLACE, International Collaboration for a Life Course Approach to Reproductive Health and Chronic Disease Events; SD, standard deviation.

<sup>†</sup> There were 20 000-25 000 people were included in the repeated assessment.

**Appendix 2. The combined effect of age at menopause and MHT on the incident CVD, CHD and stroke\***

|        | Age at menopause combined with MHT status <sup>†</sup> | N      | No. of CVD events | Sum of person years | No. of event per 1000 person-years | Adjusted hazard ratio (95% CI) |
|--------|--------------------------------------------------------|--------|-------------------|---------------------|------------------------------------|--------------------------------|
| CVD    | <40 years + MHT                                        | 1946   | 168               | 46 783.4            | 3.6                                | 1.75 (1.49, 2.04)              |
|        | <40 years + No MHT                                     | 1478   | 178               | 38 178.2            | 4.7                                | 1.53 (1.31, 1.78)              |
|        | 40-44 years + MHT                                      | 6836   | 556               | 181 261.3           | 3.1                                | 1.39 (1.27, 1.53)              |
|        | 40-44 years + No MHT                                   | 7202   | 660               | 190 881.5           | 3.5                                | 1.30 (1.19, 1.43)              |
|        | 45-49 years + MHT                                      | 18 777 | 1435              | 516 517.4           | 2.8                                | 1.24 (1.16, 1.33)              |
|        | 45-49 years + No MHT                                   | 29 284 | 1881              | 753 317.5           | 2.5                                | 1.10 (1.03, 1.17)              |
|        | 50-51 years + MHT                                      | 17 159 | 1190              | 490 060.8           | 2.4                                | 1.10 (1.02, 1.18)              |
|        | 50-51 years + No MHT                                   | 30 232 | 1826              | 813 815.2           | 2.2                                | Ref                            |
|        | 52-54 years + MHT                                      | 18 399 | 1266              | 531 391.7           | 2.4                                | 1.07 (1.00, 1.15)              |
|        | 52-54 years + No MHT                                   | 32 597 | 1880              | 898 491.7           | 2.1                                | 0.96 (0.90, 1.02)              |
|        | ≥55 years + MHT                                        | 12 468 | 880               | 375 719.3           | 2.3                                | 1.00 (0.92, 1.08)              |
|        | ≥55 years + No MHT                                     | 16 194 | 1042              | 477 057.2           | 2.2                                | 0.92 (0.86, 1.00)              |
| CHD    | <40 years + MHT                                        | 1942   | 113               | 47 010.4            | 2.4                                | 1.64 (1.35, 1.99)              |
|        | <40 years + No MHT                                     | 1477   | 140               | 38 403.7            | 3.6                                | 1.62 (1.36, 1.93)              |
|        | 40-44 years + MHT                                      | 6828   | 402               | 181 757.6           | 2.2                                | 1.41 (1.26, 1.57)              |
|        | 40-44 years + No MHT                                   | 7194   | 479               | 191 659.9           | 2.5                                | 1.38 (1.19, 1.54)              |
|        | 45-49 years + MHT                                      | 18 756 | 1047              | 517 874.0           | 2.0                                | 1.28 (1.18, 1.39)              |
|        | 45-49 years + No MHT                                   | 29 260 | 1371              | 755 046.1           | 1.8                                | 1.12 (1.04, 1.21)              |
|        | 50-51 years + MHT                                      | 17 146 | 873               | 491 329.1           | 1.8                                | 1.13 (1.04, 1.23)              |
|        | 50-51 years + No MHT                                   | 30 216 | 1307              | 816 168.0           | 1.6                                | Ref                            |
|        | 52-54 years + MHT                                      | 18 373 | 918               | 531 968.5           | 1.7                                | 1.10 (1.01, 1.20)              |
|        | 52-54 years + No MHT                                   | 32 571 | 1342              | 900 355.7           | 1.5                                | 0.96 (0.89, 1.04)              |
|        | ≥55 years + MHT                                        | 12 452 | 615               | 376 636.6           | 1.6                                | 0.98 (0.89, 1.08)              |
|        | ≥55 years + No MHT                                     | 16 176 | 762               | 477 784.3           | 1.6                                | 0.94 (0.86, 1.03)              |
| Stroke | <40 years + MHT                                        | 1940   | 67                | 47 314.1            | 1.4                                | 2.06 (1.52, 2.52)              |
|        | <40 years + No MHT                                     | 1472   | 59                | 39 160.7            | 1.5                                | 1.45 (1.11, 1.89)              |
|        | 40-44 years + MHT                                      | 6822   | 187               | 182 906.6           | 1.0                                | 1.34 (1.14, 1.57)              |
|        | 40-44 years + No MHT                                   | 7171   | 229               | 193 193.2           | 1.2                                | 1.13 (1.03, 1.22)              |
|        | 45-49 years + MHT                                      | 18 742 | 465               | 521 348.7           | 0.9                                | 1.15 (1.02, 1.30)              |
|        | 45-49 years + No MHT                                   | 29 150 | 613               | 758 116.1           | 0.8                                | 1.03 (0.92, 1.15)              |
|        | 50-51 years + MHT                                      | 17 142 | 385               | 494 539.6           | 0.8                                | 1.02 (0.90, 1.16)              |
|        | 50-51 years + No MHT                                   | 30 159 | 633               | 819 666.5           | 0.8                                | Ref                            |
|        | 52-54 years + MHT                                      | 18 375 | 419               | 535 859.5           | 0.8                                | 1.02 (0.90, 1.15)              |
|        | 52-54 years + No MHT                                   | 32 493 | 629               | 903 857.4           | 0.7                                | 0.92 (0.82, 1.02)              |
|        | ≥55 years + MHT                                        | 12 461 | 317               | 379 295.3           | 0.8                                | 1.06 (0.92, 1.21)              |
|        | ≥55 years + No MHT                                     | 16 183 | 335               | 481 643.0           | 0.7                                | 0.87 (0.76, 0.99)              |

\*Cox proportional-hazards models were used to estimate hazard ratios (HR) and 95% confidence interval (95% CI). All HRs were adjusted for age at last follow up, race/ethnicity, education, body mass index (BMI), smoking status, and hypertension status.

<sup>†</sup> Pre or perimenopause group was not included because only less than 3% pre or perimenopause women with MHT. Abbreviations: MHT, menopausal hormone therapy; CVD, cardiovascular disease; CHD, coronary heart disease.

**Appendix 3. The combined effect of age at menopause and duration of MHT, time of initiation of MHT on the incident CVD\***

|                                                  | N     | No. of CVD events | Sum of person years | No. of event per 1000 person-years | Adjusted hazard ratio (95% CI) |
|--------------------------------------------------|-------|-------------------|---------------------|------------------------------------|--------------------------------|
| <b>Duration, years</b>                           |       |                   |                     |                                    |                                |
| <40 + No MHT                                     | 839   | 86                | 20321.7             | 4.2                                | 2.03 (1.63, 2.53)              |
| <40 + Duration <10                               | 754   | 55                | 16377.3             | 3.4                                | 1.98 (1.51, 2.59)              |
| <40 + Duration ≥10                               | 687   | 48                | 17074.6             | 2.8                                | 1.66 (1.24, 2.21)              |
| 40-44 + No MHT                                   | 5000  | 354               | 122146.7            | 2.9                                | 1.44 (1.28, 1.63)              |
| 40-44 + Duration <10                             | 3184  | 214               | 77309.2             | 2.8                                | 1.52 (1.31, 1.76)              |
| 40-44 + Duration ≥10                             | 1750  | 128               | 49760.7             | 2.6                                | 1.43 (1.19, 1.72)              |
| 45-49 + No MHT                                   | 21247 | 984               | 512137              | 1.9                                | 1.13 (1.04, 1.24)              |
| 45-49 + Duration <10                             | 9583  | 561               | 246983.2            | 2.3                                | 1.31 (1.18, 1.45)              |
| 45-49 + Duration ≥10                             | 3095  | 224               | 93879.3             | 2.4                                | 1.09 (0.94, 1.26)              |
| 50-51 + No MHT                                   | 23025 | 989               | 589606.9            | 1.7                                | Ref                            |
| 50-51 + Duration <10                             | 9760  | 496               | 267442.1            | 1.9                                | 1.03 (0.93, 1.15)              |
| 50-51 + Duration ≥10                             | 2360  | 171               | 73276.1             | 2.3                                | 1.03 (0.88, 1.22)              |
| 52-54 + No MHT                                   | 25209 | 1080              | 667879.5            | 1.6                                | 0.94 (0.86, 1.03)              |
| 52-54 + Duration <10                             | 11053 | 588               | 310125.1            | 1.9                                | 1.05 (0.95, 1.16)              |
| 52-54 + Duration ≥10                             | 2122  | 150               | 65258.7             | 2.3                                | 1.04 (0.87, 1.24)              |
| ≥55 + No MHT                                     | 13306 | 666               | 381793.5            | 1.7                                | 0.89 (0.81, 0.99)              |
| ≥55 + Duration <10                               | 7135  | 429               | 210949.6            | 2.0                                | 0.99 (0.88, 1.11)              |
| ≥55 + Duration ≥10                               | 2416  | 176               | 74251.5             | 2.4                                | 1.17 (1.01, 1.34)              |
| <b>Time since menopause, years</b>               |       |                   |                     |                                    |                                |
| <40 + No MHT                                     | 841   | 86                | 20363.7             | 4.22                               | 2.03 (1.63, 2.53)              |
| <40 + Initiated MHT before menopause             | 211   | 31                | 5428.7              | 5.71                               | 1.98 (1.39, 2.84)              |
| <40 + Initiated MHT in < 1 year after menopause  | 413   | 20                | 8680.9              | 2.30                               | 1.68 (1.08, 2.62)              |
| <40 + Initiated MHT in ≥ 1 year of menopause     | 1000  | 78                | 24402.6             | 3.20                               | 1.75 (1.39, 2.2)               |
| 40-44 + No MHT                                   | 5020  | 355               | 122570.7            | 2.90                               | 1.44 (1.28, 1.63)              |
| 40-44 + Initiated MHT before menopause           | 1123  | 126               | 30226.2             | 4.17                               | 1.87 (1.55, 2.25)              |
| 40-44 + Initiated MHT in <1 year after menopause | 1593  | 89                | 38581.2             | 2.31                               | 1.36 (1.16, 1.59)              |
| 40-44 + Initiated MHT in ≥ 1 year of menopause   | 2798  | 194               | 74840.9             | 2.59                               | 1.43 (1.15, 1.78)              |
| 45-49 + No MHT                                   | 21347 | 999               | 514073              | 1.94                               | 1.14 (1.04, 1.24)              |
| 45-49 + Initiated MHT before menopause           | 4891  | 363               | 130833.4            | 2.77                               | 1.35 (1.2, 1.52)               |
| 45-49 + Initiated MHT in <1 year after menopause | 3847  | 206               | 102205.9            | 2.02                               | 1.19 (1.02, 1.38)              |
| 45-49 + Initiated MHT in ≥ 1 year of menopause   | 5492  | 362               | 151808.2            | 2.38                               | 1.2 (1.06, 1.35)               |
| 50-51 + No MHT                                   | 23132 | 1010              | 591723.9            | 1.71                               | Ref                            |
| 50-51 + Initiated MHT before menopause           | 6237  | 437               | 171525.9            | 2.55                               | 1.27 (1.14, 1.42)              |
| 50-51 + Initiated MHT in <1 year after menopause | 3690  | 181               | 105847              | 1.71                               | 0.93 (0.79, 1.09)              |
| 50-51 + Initiated MHT in ≥ 1 year of menopause   | 3616  | 179               | 104465.9            | 1.71                               | 0.87 (0.74, 1.02)              |
| 52-54 + No MHT                                   | 25342 | 1094              | 670590.67           | 1.63                               | 0.94 (0.86, 1.03)              |
| 52-54 + Initiated MHT before menopause           | 9270  | 561               | 260268.63           | 2.16                               | 1.12 (1.01, 1.24)              |
| 52-54 + Initiated MHT in <1 year after menopause | 2430  | 132               | 70652.5             | 1.87                               | 1 (0.83, 1.2)                  |
| 52-54 + Initiated MHT in ≥ 1 year of menopause   | 2888  | 163               | 85276.4             | 1.91                               | 0.96 (0.82, 1.14)              |

|                                                |       |      |           |      |                   |
|------------------------------------------------|-------|------|-----------|------|-------------------|
| ≥55 + No MHT                                   | 13342 | 671  | 382575·92 | 1·75 | 0·89 (0·81, 0·98) |
| ≥55 + Initiated MHT before menopause           | 8783  | 569  | 260782·5  | 2·18 | 1·03 (0·93, 1·14) |
| ≥55 + Initiated MHT in <1 year after menopause | 1155  | 60   | 35611·5   | 1·68 | 0·82 (0·63, 1·07) |
| ≥55 + Initiated MHT in ≥ 1 year of menopause   | 915   | 55   | 28218·5   | 1·95 | 0·83 (0·63, 1·09) |
| <b>Age at Initiation, years</b>                |       |      |           |      |                   |
| <45 + No MHT                                   | 5861  | 441  | 142934·4  | 3·09 | 1·56 (1·4, 1·73)  |
| <45 + MHT initiation at age < 60 year          | 6985  | 521  | 177290·3  | 2·94 | 1·53 (1·37, 1·71) |
| <45 + MHT initiation at age ≥ 60 y             | 153   | 17   | 4870·2    | 3·49 | 1·93 (1·12, 3·05) |
| 45-49 + No MHT                                 | 21347 | 999  | 514073    | 1·94 | 1·14 (1·04, 1·24) |
| 45-49 + MHT initiation at age < 60 year        | 13760 | 896  | 370554·7  | 2·42 | 1·25 (1·14, 1·37) |
| 45-49 + MHT initiation at age ≥ 60 y           | 470   | 35   | 14292·8   | 2·45 | 1·27 (0·73, 1·94) |
| 50-51 + No MHT                                 | 23132 | 1010 | 591723·9  | 1·71 | Ref               |
| 50-51 + MHT initiation at age < 60 year        | 12851 | 754  | 360696·5  | 2·09 | 1·07 (0·98, 1·18) |
| 50-51 + MHT initiation at age ≥ 60 y           | 692   | 43   | 21142·3   | 2·03 | 1·12 (0·68, 1·68) |
| 52-54 + No MHT                                 | 25342 | 1094 | 670590·67 | 1·63 | 0·94 (0·86, 1·02) |
| 52-54 + MHT initiation at age < 60 year        | 13048 | 762  | 370247·53 | 2·06 | 0·79 (0·42, 1·47) |
| 52-54 + MHT initiation at age ≥ 60 y           | 1540  | 94   | 45950     | 2·05 | 1·07 (0·98, 1·18) |
| ≥ 55 + No MHT                                  | 13342 | 671  | 382575·92 | 1·75 | 0·89 (0·81, 0·98) |
| ≥ 55 + MHT initiation at age < 60 year         | 8006  | 524  | 237047·5  | 2·21 | 1 (0·9, 1·1)      |
| ≥ 55 + MHT initiation at age ≥ 60 y            | 2847  | 160  | 87565     | 1·83 | 1·06 (0·77, 1·35) |

\*Cox proportional-hazards models were used to estimate hazard ratios (HR) and 95% confidence interval (95% CI). All HRs were adjusted for age at last follow up, race/ethnicity, education, body mass index (BMI), smoking status, and hypertension status.

**Appendix 4. The combined effect of age at menopause and smoking status on the incident CVD, CHD and stroke events\***

|                                     | Age at menopause combined with smoking status | N      | No. of CVD events | Sum of person years | No. of event per 1000 person-years | Adjusted hazard ratio (95% CI) |
|-------------------------------------|-----------------------------------------------|--------|-------------------|---------------------|------------------------------------|--------------------------------|
| CVD                                 | <40 years + Current smoker                    | 635    | 84                | 15 280·6            | 5·5                                | 3·15 (2·53, 3·92)              |
|                                     | <40 years + Former smoker                     | 1080   | 121               | 27 337·5            | 4·4                                | 2·19 (1·83, 2·63)              |
|                                     | <40 years + Never smokers                     | 1709   | 141               | 42 343·5            | 3·3                                | 1·52 (1·28, 1·80)              |
|                                     | 40-44 years + Current smoker                  | 2301   | 284               | 59 128·8            | 4·8                                | 2·78 (2·45, 3·16)              |
|                                     | 40-44 years + Former smoker                   | 4565   | 415               | 123 207·0           | 3·4                                | 1·69 (1·51, 1·89)              |
|                                     | 40-44 years + Never smokers                   | 7172   | 517               | 189 806·9           | 2·7                                | 1·34 (1·21, 1·48)              |
|                                     | 45-49 years + Current smoker                  | 7183   | 704               | 186 720·0           | 3·8                                | 2·28 (2·08, 2·50)              |
|                                     | 45-49 years + Former smoker                   | 15 049 | 1169              | 402 114·5           | 2·9                                | 1·57 (1·45, 1·69)              |
|                                     | 45-49 years + Never smokers                   | 25 829 | 1443              | 681 000·4           | 2·1                                | 1·14 (1·05, 1·22)              |
|                                     | 50-51 years + Current smoker                  | 5110   | 530               | 140 313·5           | 3·8                                | 2·16 (1·95, 2·38)              |
|                                     | 50-51 years + Former smoker                   | 14 809 | 1071              | 410 244·2           | 2·6                                | 1·40 (1·29, 1·52)              |
|                                     | 50-51 years + Never smokers                   | 27 472 | 1415              | 753 318·4           | 1·9                                | Ref                            |
|                                     | 52-54 years + Current smoker                  | 4524   | 433               | 127 710·7           | 3·4                                | 1·87 (1·67, 2·08)              |
|                                     | 52-54 years + Former smoker                   | 15 980 | 1118              | 448 117·8           | 2·5                                | 1·34 (1·24, 1·45)              |
|                                     | 52-54 years + Never smokers                   | 30 492 | 1595              | 854 054·8           | 1·9                                | 1·01 (0·94, 1·08)              |
|                                     | ≥55 years + Current smoker                    | 1908   | 195               | 56 740·3            | 3·4                                | 1·79 (1·55, 2·08)              |
|                                     | ≥55 years + Former smoker                     | 9382   | 664               | 279 250·9           | 2·4                                | 1·19 (1·08, 1·30)              |
|                                     | ≥55 years + Never smokers                     | 17 372 | 1063              | 516 785·2           | 2·1                                | 1·00 (0·92, 1·08)              |
|                                     | Pre or perimenopause + Current smoker         | 15 426 | 545               | 295 505·9           | 1·8                                | 1·07 (0·92, 1·24)              |
|                                     | Pre or perimenopause + Former smoker          | 24 458 | 1071              | 796 697·8           | 1·3                                | 0·70 (0·63, 0·78)              |
| Pre or perimenopause + Never smoker | 70 736                                        | 1624   | 1719 610·4        | 0·9                 | 0·51 (0·46, 0·56)                  |                                |
| CHD                                 | <40 years + Current smoker                    | 634    | 60                | 15 371·3            | 3·9                                | 3·12 (2·40, 4·04)              |
|                                     | <40 years + Former smoker                     | 1079   | 88                | 27 570·0            | 3·2                                | 2·35 (1·89, 2·92)              |
|                                     | <40 years + Never smokers                     | 1706   | 105               | 42 472·8            | 2·5                                | 1·80 (1·47, 2·20)              |
|                                     | 40-44 years + Current smoker                  | 2299   | 217               | 59 381·5            | 3·7                                | 2·54 (2·20, 2·95)              |
|                                     | 40-44 years + Former smoker                   | 4557   | 302               | 123 607·5           | 2·4                                | 1·73 (1·52, 1·97)              |
|                                     | 40-44 years + Never smokers                   | 7166   | 362               | 190 428·5           | 1·9                                | 1·35 (1·20, 1·52)              |
|                                     | 45-49 years + Current smoker                  | 7177   | 516               | 187 403·2           | 2·8                                | 1·93 (1·74, 2·15)              |
|                                     | 45-49 years + Former smoker                   | 15 029 | 859               | 403 072·0           | 2·1                                | 1·56 (1·43, 1·71)              |
|                                     | 45-49 years + Never smokers                   | 25 810 | 1043              | 682 444·8           | 1·5                                | 1·16 (1·06, 1·26)              |
|                                     | 50-51 years + Current smoker                  | 5105   | 395               | 140 759·6           | 2·8                                | 1·86 (1·65, 2·09)              |
|                                     | 50-51 years + Former smoker                   | 14 801 | 778               | 411 725·9           | 1·9                                | 1·36 (1·24, 1·49)              |
|                                     | 50-51 years + Never smokers                   | 27 456 | 1007              | 755 011·6           | 1·3                                | Ref                            |
|                                     | 52-54 years + Current smoker                  | 4516   | 320               | 127 976·6           | 2·5                                | 1·64 (1·45, 1·86)              |
|                                     | 52-54 years + Former smoker                   | 15 960 | 804               | 448 828·1           | 1·8                                | 1·33 (1·22, 1·46)              |
|                                     | 52-54 years + Never smokers                   | 30 468 | 1136              | 855 519·5           | 1·3                                | 1·00 (0·92, 1·09)              |
|                                     | ≥55 years + Current smoker                    | 1907   | 139               | 56 958·1            | 2·4                                | 1·62 (1·36, 1·93)              |
|                                     | ≥55 years + Former smoker                     | 9370   | 500               | 279 678·1           | 1·8                                | 1·24 (1·12, 1·38)              |
|                                     | ≥55 years + Never smokers                     | 17 351 | 738               | 517 784·8           | 1·4                                | 1·00 (0·91, 1·10)              |
|                                     | Pre or perimenopause + Current smoker         | 15 423 | 384               | 308 607·8           | 1·2                                | 1·31 (1·14, 1·51)              |

|        |                                       |        |      |            |     |                   |
|--------|---------------------------------------|--------|------|------------|-----|-------------------|
|        | Pre or perimenopause + Former smoker  | 24 455 | 781  | 826 953.9  | 0.9 | 0.89 (0.74, 1.07) |
|        | Pre or perimenopause + Never smoker   | 70 730 | 1061 | 1646 492.6 | 0.6 | 0.66 (0.54, 0.80) |
|        | <40 years + Current smoker            | 634    | 33   | 15 635.6   | 2.1 | 3.41 (2.39, 4.84) |
|        | <40 years + Former smoker             | 1072   | 48   | 27 707.2   | 1.7 | 2.61 (1.94, 3.50) |
|        | <40 years + Never smokers             | 1706   | 45   | 43 132.0   | 1.0 | 1.53 (1.12, 2.07) |
|        | 40-44 years + Current smoker          | 2289   | 95   | 59 921.9   | 1.6 | 2.26 (1.81, 2.81) |
|        | 40-44 years + Former smoker           | 4550   | 140  | 124 669.2  | 1.1 | 1.64 (1.36, 1.98) |
|        | 40-44 years + Never smokers           | 7154   | 181  | 191 508.8  | 0.9 | 1.39 (1.17, 1.64) |
|        | 45-49 years + Current smoker          | 7137   | 238  | 187 995.4  | 1.3 | 1.82 (1.56, 2.13) |
|        | 45-49 years + Former smoker           | 14 993 | 368  | 405 981.3  | 0.9 | 1.37 (1.20, 1.57) |
|        | 45-49 years + Never smokers           | 25 762 | 472  | 685 488.1  | 0.7 | 1.08 (0.95, 1.23) |
|        | 50-51 years + Current smoker          | 5092   | 172  | 141 707.4  | 1.2 | 1.65 (1.39, 1.96) |
| Stroke | 50-51 years + Former smoker           | 14 775 | 363  | 413 744.1  | 0.9 | 1.32 (1.15, 1.51) |
|        | 50-51 years +Never smokers            | 27 434 | 483  | 758 754.7  | 0.6 | Ref               |
|        | 52-54 years + Current smoker          | 4507   | 141  | 128 840.0  | 1.1 | 1.47 (1.22, 1.77) |
|        | 52-54 years + Former smoker           | 15 936 | 375  | 451 744.9  | 0.8 | 1.29 (1.13, 1.47) |
|        | 52-54 years +Never smokers            | 30 425 | 532  | 859 132.0  | 0.6 | 0.98 (0.87, 1.11) |
|        | ≥55 years + Current smoker            | 1906   | 70   | 57 478.4   | 1.2 | 1.70 (1.32, 2.18) |
|        | ≥55 years + Former smoker             | 9379   | 207  | 282 269.8  | 0.7 | 1.07 (0.91, 1.26) |
|        | ≥55 years + Never smokers             | 17 359 | 375  | 521 190.1  | 0.7 | 1.06 (0.93, 1.22) |
|        | Pre or perimenopause + Current smoker | 15 412 | 224  | 411 462.4  | 0.5 | 0.86 (0.77, 0.95) |
|        | Pre or perimenopause + Former smoker  | 24 413 | 375  | 1120 071.0 | 0.3 | 0.52 (0.45, 0.59) |
|        | Pre or perimenopause + Never smoker   | 70 685 | 520  | 1510 749.9 | 0.3 | 0.41 (0.35, 0.49) |

\*Cox proportional-hazards models were used to estimate hazard ratios (HR) and 95% confidence interval (95% CI). All HRs were adjusted for age at last follow up, race/ethnicity, education, body mass index (BMI), hypertension status, and postmenopausal menopausal hormone therapy (MHT) status or oral contraception pills use in pre-or perimenopause group. Abbreviations: CVD, cardiovascular disease; CHD, coronary heart disease.



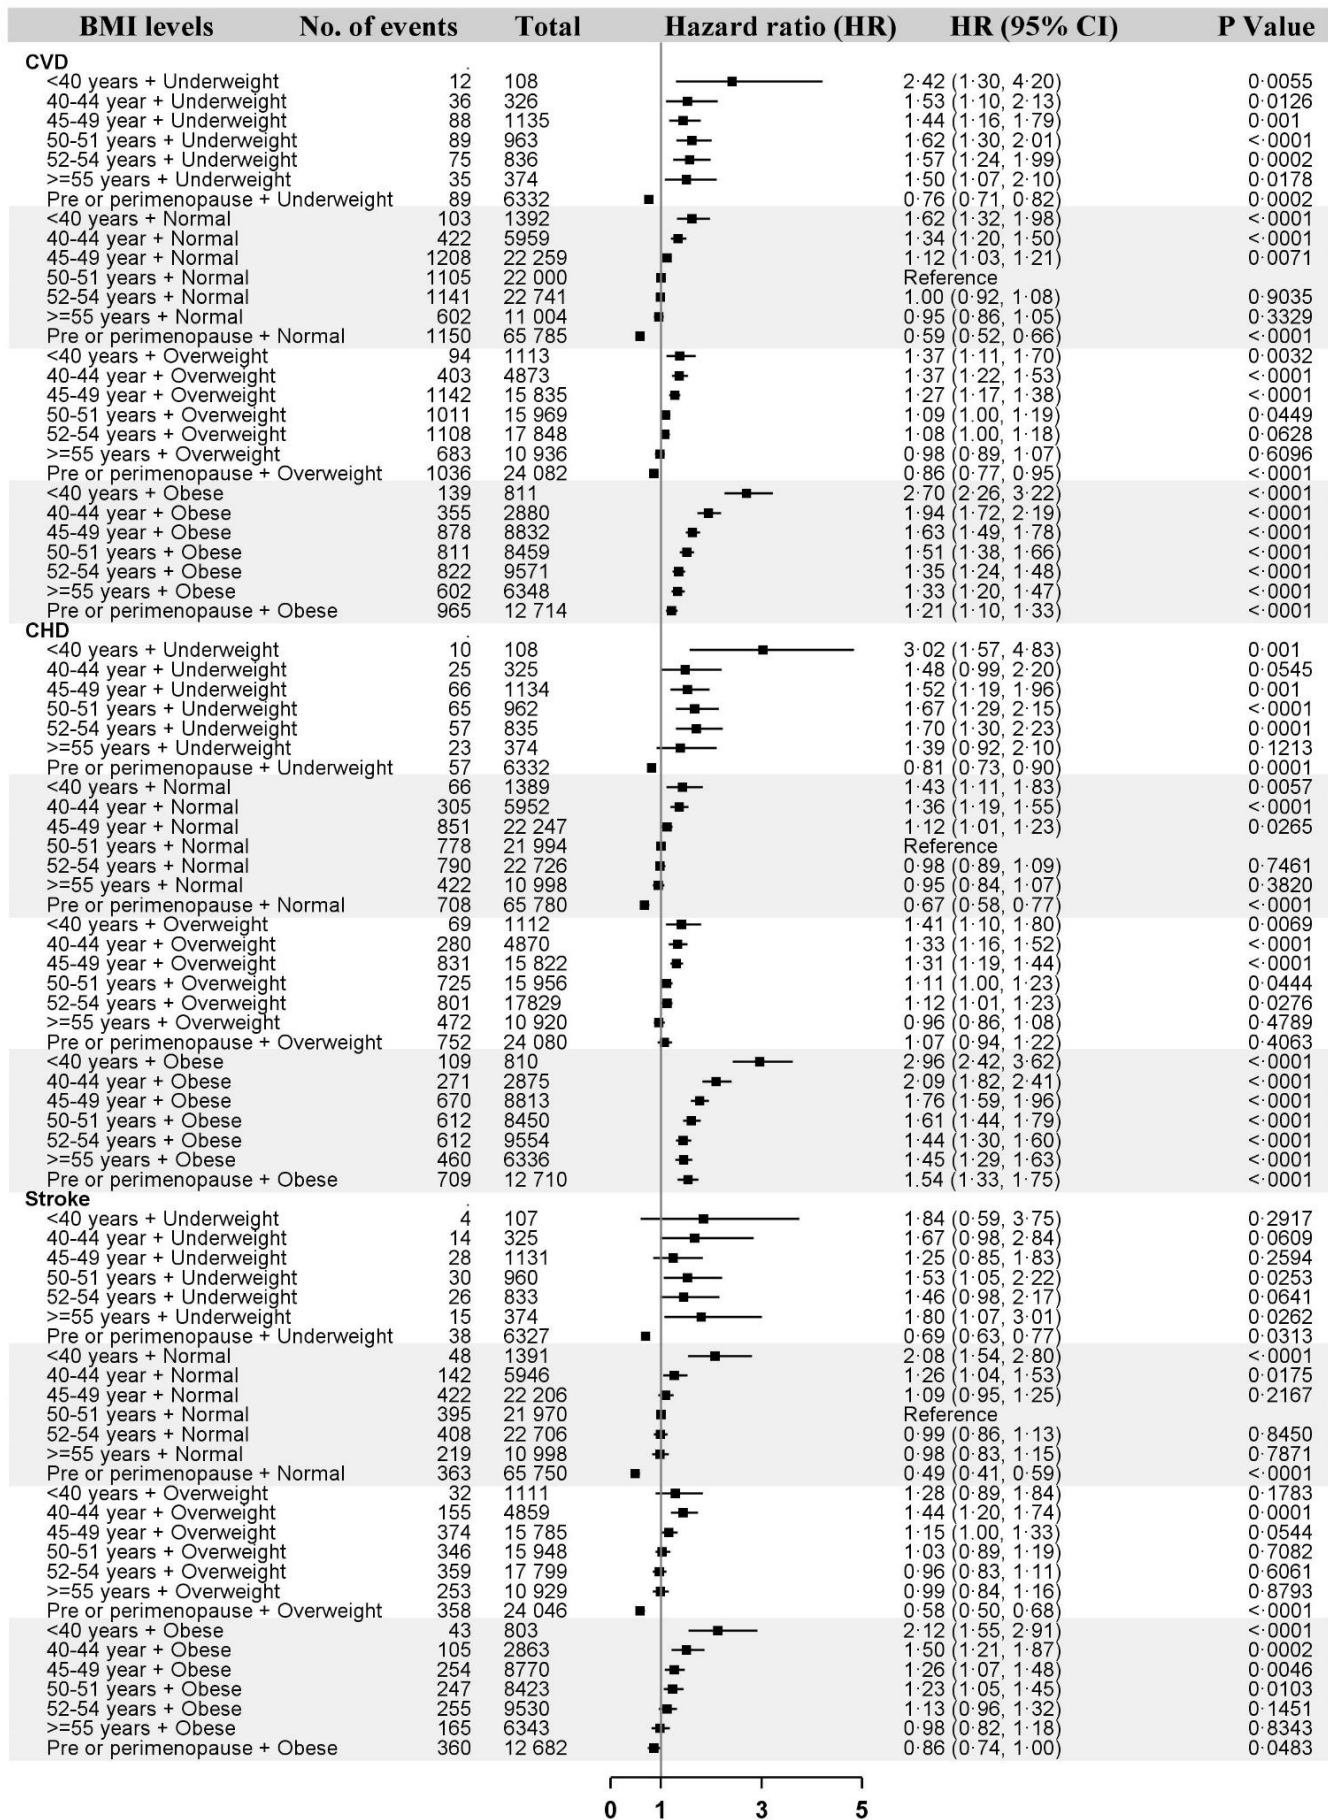

**Appendix 5: The combined effect of age at menopause and body mass index (BMI) levels on the incident CVD, CHD and stroke events.** Cox proportional-hazards models were used to estimate hazard ratios (HR) and 95% confidence interval (95% CI). All HRs were adjusted for age at last follow up, race/ethnicity, education, smoking, hypertension status, and postmenopausal menopausal hormone therapy (MHT) status. Abbreviations: CVD, cardiovascular disease; CHD, coronary heart disease.

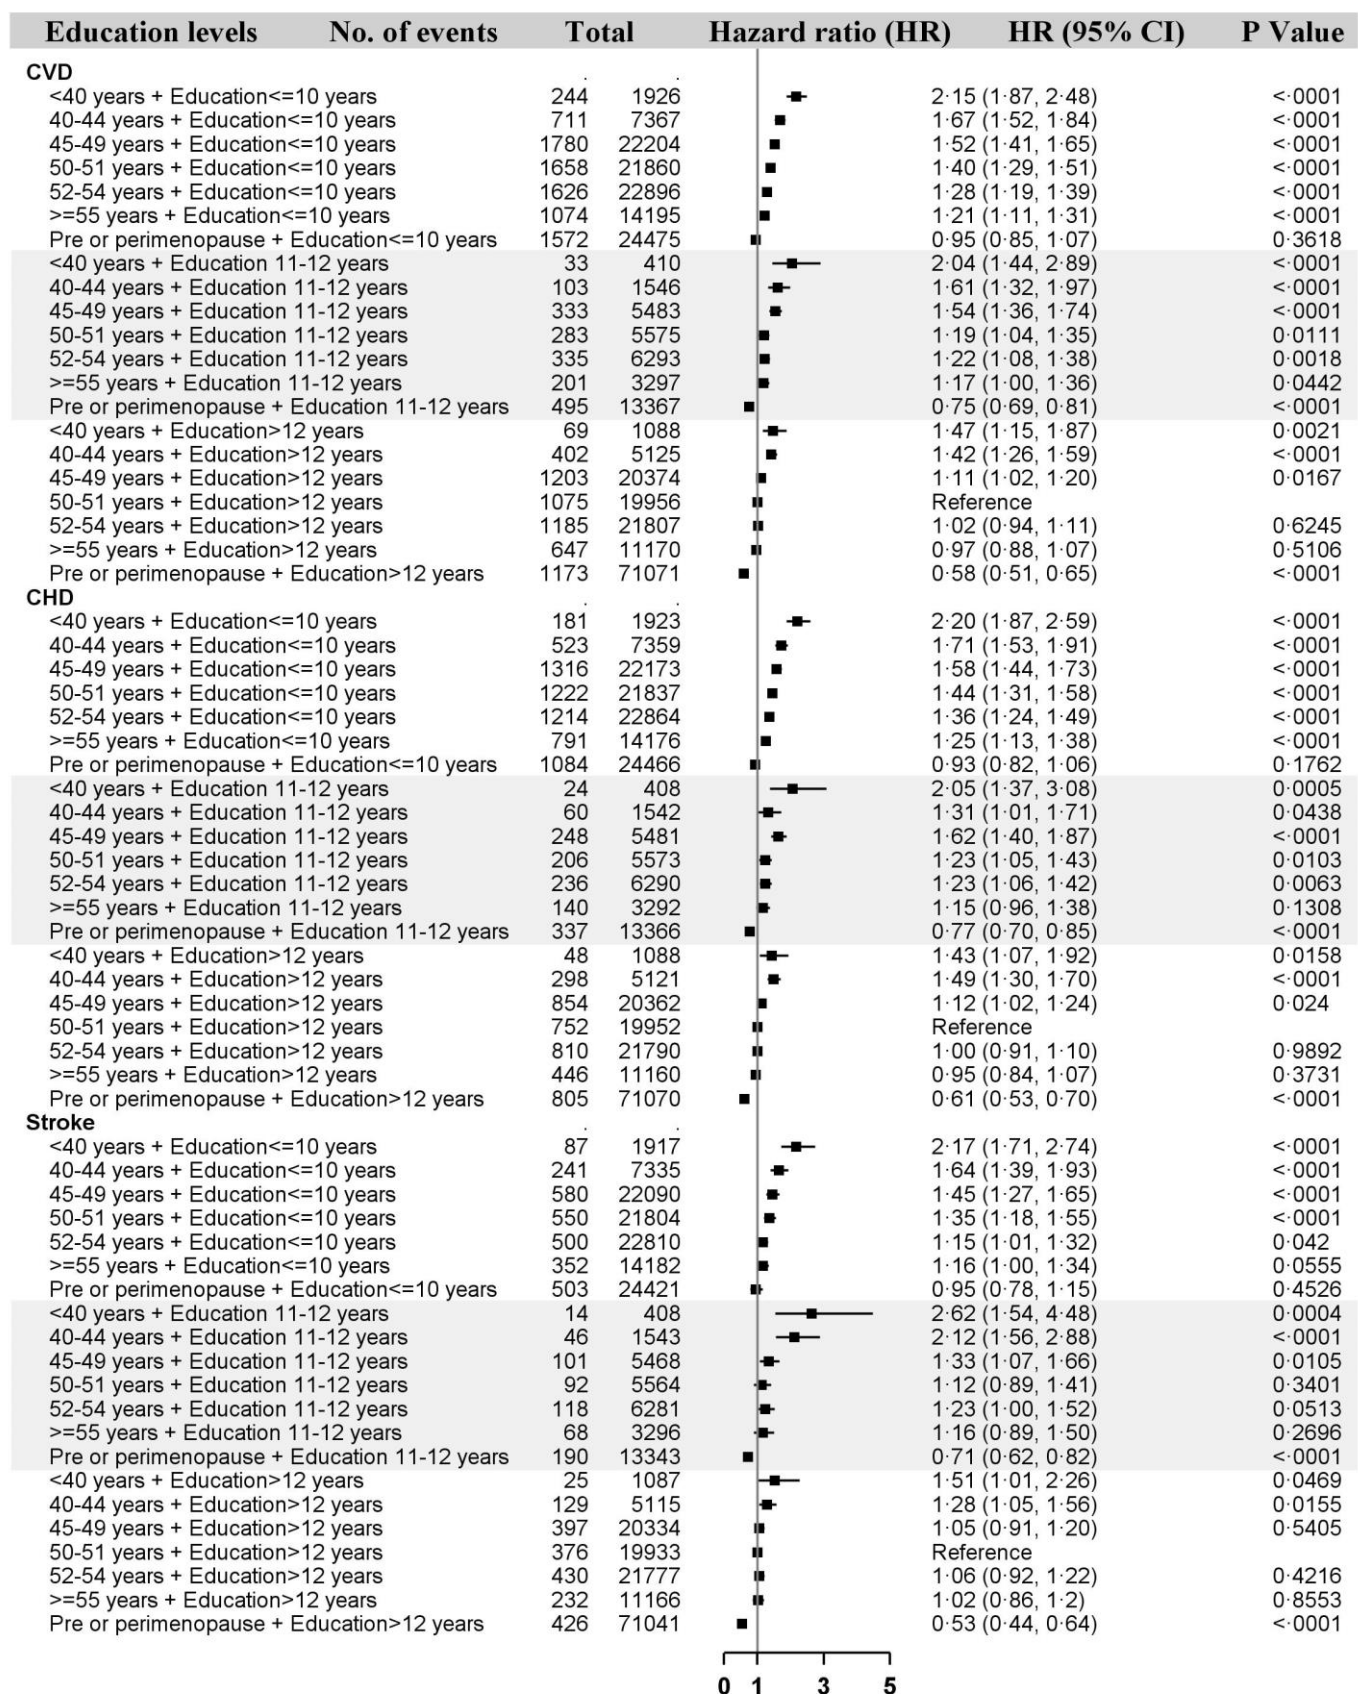

**Appendix 6: The combined effect of age at menopause and education levels on the incident CVD, CHD and stroke.** Cox proportional-hazards models were used to estimate hazard ratios (HR) and 95% confidence interval (95% CI). All HRs were adjusted for age at last follow up, race/ethnicity, body mass index (BMI), smoking status, hypertension status, and postmenopausal menopausal hormone therapy (MHT) status. Abbreviations: CVD, cardiovascular disease; CHD, coronary heart disease.

**Appendix 7. The associations between age at menopause and incident CVD – Only cases with hospital record of diagnosis were included (based on 3 studies: DNC, WLH, and UK Biobank) \***

|        | Age at natural menopause (years) † | Adjusted hazard ratio (95% CI) |                                              |                   |                   |
|--------|------------------------------------|--------------------------------|----------------------------------------------|-------------------|-------------------|
|        |                                    | Overall                        | Stratified by age at first CVD event (years) |                   |                   |
|        |                                    |                                | <60                                          | 65-69             | 70+               |
| CVD    | <40                                | 1.64 (1.39, 1.94)              | 2.05 (1.71, 2.45)                            | 1.34 (1.17, 1.54) | 1.50 (1.01, 2.25) |
|        | 40-44                              | 1.43 (1.30, 1.56)              | 1.49 (1.34, 1.67)                            | 1.25 (0.94, 1.65) | 1.13 (0.93, 1.38) |
|        | 45-49                              | 1.14 (1.07, 1.22)              | 1.17 (1.07, 1.27)                            | 1.14 (1.03, 1.27) | 1.04 (0.91, 1.19) |
|        | 50-51                              | 1.00                           | 1.00                                         | 1.00              | 1.00              |
|        | 52-54                              | 1.02 (0.95, 1.09)              | 0.91 (0.84, 1.00)                            | 1.05 (0.95, 1.17) | 1.01 (0.87, 1.16) |
|        | ≥55                                | 0.89 (0.82, 0.96)              | 0.81 (0.73, 0.89)                            | 0.91 (0.81, 1.02) | 1.01 (0.85, 1.20) |
| CHD    | <40                                | 1.56 (1.28, 1.90)              | 2.09 (1.68, 2.60)                            | 1.38 (1.17, 1.63) | 0.86 (0.45, 1.61) |
|        | 40-44                              | 1.44 (1.30, 1.60)              | 1.49 (1.30, 1.71)                            | 1.26 (0.91, 1.76) | 1.11 (0.87, 1.41) |
|        | 45-49                              | 1.13 (1.04, 1.23)              | 1.23 (1.11, 1.37)                            | 1.17 (1.03, 1.33) | 0.95 (0.8, 1.12)  |
|        | 50-51                              | 1.00                           | 1.00                                         | 1.00              | 1.00              |
|        | 52-54                              | 0.98 (0.91, 1.07)              | 0.94 (0.84, 1.04)                            | 1.03 (0.91, 1.17) | 0.93 (0.79, 1.11) |
|        | ≥55                                | 0.86 (0.79, 0.95)              | 0.86 (0.77, 0.97)                            | 0.86 (0.74, 0.99) | 0.83 (0.67, 1.03) |
| Stroke | <40                                | 1.84 (1.39, 2.45)              | 1.88 (1.39, 2.55)                            | 1.26 (0.8, 1.99)  | 2.38 (1.47, 3.87) |
|        | 40-44                              | 1.43 (1.22, 1.68)              | 1.48 (1.24, 1.78)                            | 1.27 (1.00, 1.6)  | 1.26 (0.93, 1.72) |
|        | 45-49                              | 1.16 (1.03, 1.31)              | 1.05 (0.91, 1.21)                            | 1.06 (0.89, 1.26) | 1.18 (0.95, 1.47) |
|        | 50-51                              | 1.00                           | 1.00                                         | 1.00              | 1.00              |
|        | 52-54                              | 1.11 (0.98, 1.25)              | 0.85 (0.74, 0.98)                            | 1.09 (0.92, 1.29) | 1.18 (0.94, 1.48) |
|        | ≥55                                | 0.94 (0.82, 1.08)              | 0.67 (0.56, 0.80)                            | 1.00 (0.83, 1.20) | 1.39 (1.09, 1.78) |

\* Cox proportional-hazards models were used to estimate hazard ratios (HR) and 95% confidence interval (95% CI). All HRs were adjusted for age at last follow up, race/ethnicity, education, body mass index (BMI), smoking status, hypertension status, and postmenopausal menopausal hormone therapy (MHT) status. Abbreviations: CVD, cardiovascular disease; CHD, coronary heart disease.

**Appendix 8. The associations between age at menopause and incident CVD – after excluding UK Biobank study\***

|        | Age at natural menopause <sup>†</sup> (years) | Adjusted hazard ratio (95% CI) |                                                           |                   |                   |
|--------|-----------------------------------------------|--------------------------------|-----------------------------------------------------------|-------------------|-------------------|
|        |                                               | Overall                        | Stratified by age at first CVD event (years) <sup>†</sup> |                   |                   |
|        |                                               |                                | <60                                                       | 60-69             | 70+               |
| CVD    | <40                                           | 1.61 (1.25, 2.06)              | -                                                         | -                 | -                 |
|        | 40-44                                         | 1.36 (1.16, 1.59)              | 2.06 (1.55, 2.74)                                         | 1.33 (1.09, 1.61) | 1.09 (0.90, 1.32) |
|        | 45-49                                         | 1.15 (0.99, 1.34)              | 1.70 (1.22, 2.37)                                         | 1.04 (0.92, 1.18) | 1.09 (0.88, 1.36) |
|        | 50-51                                         | 1.00                           | 1.00                                                      | 1.00              | 1.00              |
|        | 52-54                                         | 0.94 (0.89, 0.99)              | 1.10 (0.85, 1.42)                                         | 1.08 (0.98, 1.19) | 0.98 (0.86, 1.12) |
|        | 55+                                           | 0.82 (0.71, 0.94)              | 0.86 (0.64, 1.17)                                         | 1.05 (0.93, 1.18) | 0.96 (0.78, 1.17) |
| CHD    | <40                                           | 1.68 (1.29, 2.20)              | -                                                         | -                 | -                 |
|        | 40-44                                         | 1.35 (1.15, 1.59)              | 2.31 (1.71, 3.11)                                         | 1.24 (1.12, 1.37) | 1.19 (1.04, 1.36) |
|        | 45-49                                         | 1.13 (0.95, 1.33)              | 1.73 (1.21, 2.46)                                         | 1.02 (0.86, 1.21) | 1.04 (0.81, 1.34) |
|        | 50-51                                         | 1.00                           | 1.00                                                      | 1.00              | 1.00              |
|        | 52-54                                         | 0.93 (0.86, 1.00)              | 1.21 (0.93, 1.56)                                         | 1.03 (0.92, 1.17) | 0.99 (0.89, 1.10) |
|        | 55+                                           | 0.82 (0.69, 0.97)              | 1.07 (0.78, 1.47)                                         | 1.05 (0.95, 1.16) | 0.90 (0.76, 1.08) |
| Stroke | <40                                           | 1.74 (1.24, 2.43)              | -                                                         | -                 | -                 |
|        | 40-44                                         | 1.29 (1.15, 1.46)              | 1.77 (0.99, 3.16)                                         | 1.26 (0.69, 2.31) | 1.02 (0.62, 1.68) |
|        | 45-49                                         | 1.19 (1.05, 1.35)              | 1.74 (1.28, 2.36)                                         | 1.06 (0.76, 1.48) | 1.17 (0.90, 1.51) |
|        | 50-51                                         | 1.00                           | 1.00                                                      | 1.00              | 1.00              |
|        | 52-54                                         | 0.97 (0.84, 1.13)              | 0.84 (0.32, 1.72)                                         | 1.16 (0.77, 1.75) | 0.94 (0.82, 1.08) |
|        | 55+                                           | 0.87 (0.71, 1.06)              | 0.38 (0.13, 1.08)                                         | 1.21 (0.73, 2.02) | 1.00 (0.69, 1.45) |

\* Cox proportional-hazards models were used to estimate hazard ratios (HR) and 95% confidence interval (95% CI). All HRs were adjusted for age at last follow up, race/ethnicity, education, body mass index (BMI), smoking status, hypertension status, and postmenopausal menopausal hormone therapy (MHT) status.

<sup>†</sup> When stratified by age at first CVD event, menopause at <40 and 40-44 years were combined as <45 years to get sufficient number of women.

Abbreviations: CVD, cardiovascular disease; CHD, coronary heart disease.

**Appendix 9. The associations between age at menopause and incident CVD - only include CVD events which occurred at least three years after menopause**

|        | Age at natural menopause <sup>†</sup><br>(years) | Adjusted hazard ratio (95% CI) |                                              |                   |                   |
|--------|--------------------------------------------------|--------------------------------|----------------------------------------------|-------------------|-------------------|
|        |                                                  | Overall                        | Stratified by age at first CVD event (years) |                   |                   |
|        |                                                  |                                | <60                                          | 60-69             | 70+               |
| CVD    | <40                                              | 2.01 (1.79, 2.26)              | 1.89 (1.62, 2.20)                            | 1.35 (1.10, 1.66) | 1.26 (0.95, 1.67) |
|        | 40-44                                            | 1.61 (1.50, 1.73)              | 1.40 (1.27, 1.54)                            | 1.30 (1.16, 1.46) | 1.09 (0.93, 1.28) |
|        | 45-49                                            | 1.25 (1.18, 1.32)              | 1.17 (1.09, 1.25)                            | 1.07 (0.98, 1.17) | 1.11 (0.99, 1.24) |
|        | 50-51                                            | 1.00                           | 1.00                                         | 1.00              | 1.00              |
|        | 52-54                                            | 0.91 (0.85, 0.96)              | 0.91 (0.85, 0.98)                            | 0.99 (0.91, 1.08) | 1.03 (0.92, 1.16) |
|        | 55+                                              | 0.68 (0.63, 0.73)              | 0.82 (0.75, 0.89)                            | 0.91 (0.83, 1.00) | 0.96 (0.83, 1.10) |
| CHD    | <40                                              | 1.97 (1.72, 2.26)              | 1.85 (1.55, 2.21)                            | 1.43 (1.13, 1.80) | 1.04 (0.73, 1.47) |
|        | 40-44                                            | 1.62 (1.49, 1.76)              | 1.38 (1.23, 1.54)                            | 1.33 (1.16, 1.52) | 1.07 (0.89, 1.29) |
|        | 45-49                                            | 1.26 (1.18, 1.35)              | 1.19 (1.10, 1.30)                            | 1.10 (0.99, 1.22) | 1.04 (0.91, 1.19) |
|        | 50-51                                            | 1.00                           | 1.00                                         | 1.00              | 1.00              |
|        | 52-54                                            | 0.90 (0.84, 0.97)              | 0.93 (0.86, 1.01)                            | 0.99 (0.89, 1.10) | 0.98 (0.85, 1.12) |
|        | 55+                                              | 0.67 (0.61, 0.73)              | 0.86 (0.78, 0.95)                            | 0.92 (0.82, 1.03) | 0.86 (0.73, 1.02) |
| Stroke | <40                                              | 2.14 (1.77, 2.60)              | 1.93 (1.48, 2.52)                            | 1.32 (0.91, 1.89) | 1.94 (1.33, 2.83) |
|        | 40-44                                            | 1.56 (1.38, 1.76)              | 1.44 (1.22, 1.70)                            | 1.23 (1.01, 1.50) | 1.20 (0.93, 1.55) |
|        | 45-49                                            | 1.18 (1.07, 1.30)              | 1.11 (0.98, 1.26)                            | 0.99 (0.85, 1.15) | 1.22 (1.01, 1.46) |
|        | 50-51                                            | 1.00                           | 1.00                                         | 1.00              | 1.00              |
|        | 52-54                                            | 0.90 (0.82, 1.00)              | 0.85 (0.75, 0.96)                            | 0.98 (0.85, 1.14) | 1.14 (0.94, 1.38) |
|        | 55+                                              | 0.72 (0.64, 0.81)              | 0.69 (0.60, 0.81)                            | 0.90 (0.76, 1.06) | 1.16 (0.94, 1.44) |

\* Cox proportional-hazards models were used to estimate hazard ratios (HR) and 95% confidence interval (95% CI). All HRs were adjusted for age at last follow up, race/ethnicity, education, body mass index (BMI), smoking status, hypertension status, and postmenopausal menopausal hormone therapy (MHT) status. Abbreviations: CVD, cardiovascular disease; CHD, coronary heart disease.

**Appendix 10. The associations between age at natural menopause and specific types of CHD and stroke (based on 11 studies) \***

| Age at natural menopause (years) | CHD: Adjusted hazard ratio (95% CI) |                   | Stroke: Adjusted hazard ratio (95% CI) |                     |
|----------------------------------|-------------------------------------|-------------------|----------------------------------------|---------------------|
|                                  | Heart attack                        | Angina pectoris   | Ischemic stroke                        | Haemorrhagic stroke |
| <40                              | 1.62 (1.27, 2.07)                   | 1.58 (1.34, 1.87) | 1.81 (1.04, 3.17)                      | 1.94 (1.06, 3.56)   |
| 40-44                            | 1.61 (1.40, 1.86)                   | 1.31 (1.18, 1.45) | 1.44 (1.03, 2.00)                      | 1.63 (1.15, 2.32)   |
| 45-49                            | 1.17 (1.04, 1.30)                   | 1.10 (1.02, 1.19) | 1.19 (0.92, 1.54)                      | 1.16 (0.87, 1.54)   |
| 50-51                            | 1.00                                | 1.00              | 1.00                                   | 1.00                |
| 52-54                            | 1.00 (0.89, 1.12)                   | 0.96 (0.89, 1.03) | 1.27 (1.00, 1.63)                      | 1.11 (0.85, 1.46)   |
| ≥55                              | 0.96 (0.84, 1.10)                   | 0.91 (0.83, 0.99) | 1.22 (0.93, 1.58)                      | 0.83 (0.60, 1.15)   |
| Pre- or perimenopause            | 0.61 (0.54, 0.70)                   | 0.67 (0.62, 0.73) | 0.85 (0.63, 1.15)                      | 1.00 (0.74, 1.36)   |

\* Cox proportional-hazards models were used to estimate hazard ratios (HR) and 95% confidence interval (95% CI). All HRs were adjusted for age at last follow up, race/ethnicity, education, body mass index (BMI), hypertension status, and postmenopausal menopausal hormone therapy (MHT) status. Abbreviations: CHD, coronary heart disease.

**Appendix 11. Comparison of women's characteristics in complete dataset used for analysis and the dataset with missing values**

|                                           | Complete Dataset used |       | Missing data |       |
|-------------------------------------------|-----------------------|-------|--------------|-------|
|                                           | n                     | %     | n            | %     |
| <b>Race/ethnicity</b>                     |                       |       |              |       |
| Caucasian-Australian                      | 14651                 | 4.86  | 1167         | 2.82  |
| Caucasian-European                        | 229962                | 76.28 | 35823        | 86.56 |
| Asian                                     | 48199                 | 15.99 | 3162         | 7.64  |
| Others                                    | 8673                  | 2.87  | 1233         | 2.98  |
| <b>Body mass index (kg/m<sup>2</sup>)</b> |                       |       |              |       |
| Underweight<18.5                          | 10074                 | 3.34  | 6932         | 16.75 |
| Normal[18.5,25.0)                         | 151140                | 50.13 | 20221        | 48.86 |
| Overweight[25.0,30.0)                     | 90656                 | 30.07 | 9452         | 22.84 |
| Obese>=30                                 | 49615                 | 16.46 | 4780         | 11.55 |
| <b>Smoking status</b>                     |                       |       |              |       |
| never                                     | 179840                | 59.65 | 17804        | 47.1  |
| past                                      | 84868                 | 28.15 | 11805        | 31.23 |
| current                                   | 36777                 | 12.2  | 8191         | 21.67 |
| <b>Education level (years)</b>            |                       |       |              |       |
| ≤10                                       | 114923                | 38.12 | 14393        | 36.74 |
| 11-12                                     | 35971                 | 11.93 | 5210         | 13.3  |
| >12                                       | 150591                | 49.95 | 19572        | 49.96 |
| <b>Age at last follow-up (years)</b>      |                       |       |              |       |
| <60                                       | 191085                | 63.38 | 33728        | 81.67 |
| 60-64                                     | 56089                 | 18.6  | 2742         | 6.64  |
| 65-69                                     | 38991                 | 12.93 | 2395         | 5.8   |
| 70+                                       | 15320                 | 5.08  | 2437         | 5.9   |
| <b>Hypertension status</b>                |                       |       |              |       |
| No                                        | 243896                | 80.9  | 4711         | 78.79 |
| Yes                                       | 57589                 | 19.1  | 1268         | 21.21 |
| <b>Postmenopausal MHT users</b>           |                       |       |              |       |
| No                                        | 222446                | 73.78 | 18835        | 74.86 |
| Yes                                       | 79039                 | 26.22 | 6325         | 25.14 |
| <b>Number of children</b>                 |                       |       |              |       |
| 0                                         | 56717                 | 19.57 | 4866         | 12.53 |
| 1                                         | 37598                 | 12.97 | 5296         | 13.64 |
| 2                                         | 120310                | 41.51 | 16481        | 42.45 |
| 3+                                        | 75222                 | 25.95 | 12182        | 31.38 |
| <b>Age at menarche (years)</b>            |                       |       |              |       |
| ≤11                                       | 53297                 | 18.39 | 5311         | 13.93 |
| 12                                        | 60813                 | 20.98 | 8035         | 21.08 |
| 13                                        | 74118                 | 25.57 | 11275        | 29.57 |
| 14                                        | 57665                 | 19.89 | 7941         | 20.83 |
| ≥15                                       | 43954                 | 15.16 | 5562         | 14.59 |

**Appendix 12. The associations (adjusted HR, 95%CI) between age at natural menopause and incident CVD - after missing covariates were imputed \***

|        | Age at natural menopause | Overall           | Age at first CVD: <60 years | Age at first CVD: 60-69 years | Age at first CVD: 70+ years |
|--------|--------------------------|-------------------|-----------------------------|-------------------------------|-----------------------------|
| CVD    | <40                      | 1.53 (1.37, 1.71) | 1.80 (1.55, 2.09)           | 1.34 (1.09, 1.65)             | 1.25 (0.95, 1.66)           |
|        | 40-44                    | 1.27 (1.19, 1.35) | 1.34 (1.22, 1.48)           | 1.28 (1.14, 1.44)             | 1.08 (0.93, 1.27)           |
|        | 45-49                    | 1.11 (1.06, 1.17) | 1.15 (1.07, 1.23)           | 1.08 (0.99, 1.17)             | 1.11 (1.00, 1.24)           |
|        | 50-51                    | 1.0               | 1.0                         | 1.0                           | 1.0                         |
|        | 52-54                    | 0.97 (0.92, 1.02) | 0.93 (0.86, 1)              | 1.02 (0.94, 1.11)             | 1.03 (0.92, 1.16)           |
|        | ≥55                      | 0.89 (0.84, 0.95) | 0.82 (0.75, 0.89)           | 0.94 (0.85, 1.03)             | 0.96 (0.83, 1.10)           |
|        | CHD                      | <40               | 1.53 (1.37, 1.71)           | 1.79 (1.55, 2.11)             | 1.47 (1.17, 1.86)           |
| 40-44  |                          | 1.27 (1.17, 1.37) | 1.32 (1.18, 1.48)           | 1.31 (1.15, 1.5)              | 1.07 (0.89, 1.29)           |
| 45-49  |                          | 1.13 (1.06, 1.19) | 1.18 (1.09, 1.28)           | 1.11 (1, 1.23)                | 1.04 (0.91, 1.19)           |
| 50-51  |                          | 1.0               | 1.0                         | 1.0                           | 1.0                         |
| 52-54  |                          | 0.97 (0.91, 1.03) | 0.94 (0.86, 1.02)           | 1.01 (0.91, 1.12)             | 0.98 (0.85, 1.12)           |
| ≥55    |                          | 0.88 (0.82, 0.94) | 0.83 (0.76, 0.92)           | 0.93 (0.83, 1.04)             | 0.86 (0.73, 1.02)           |
| Stroke |                          | <40               | 1.62 (1.35, 1.96)           | 1.88 (1.44, 2.44)             | 1.28 (0.89, 1.83)           |
|        | 40-44                    | 1.27 (1.14, 1.43) | 1.39 (1.18, 1.64)           | 1.21 (0.99, 1.48)             | 1.2 (0.93, 1.55)            |
|        | 45-49                    | 1.07 (0.98, 1.17) | 1.1 (0.97, 1.24)            | 0.98 (0.84, 1.14)             | 1.22 (1.01, 1.46)           |
|        | 50-51                    | 1.0               | 1.0                         | 1.0                           | 1.0                         |
|        | 52-54                    | 0.96 (0.88, 1.04) | 0.86 (0.76, 0.98)           | 1.01 (0.87, 1.18)             | 1.14 (0.94, 1.38)           |
|        | ≥55                      | 0.9 (0.82, 1)     | 0.71 (0.6, 0.82)            | 0.95 (0.81, 1.12)             | 1.16 (0.94, 1.44)           |

\* Cox proportional-hazards models were used to estimate hazard ratios (HR) and 95% confidence interval (95% CI). All HRs were adjusted for age at last follow up, race/ethnicity, education, body mass index (BMI), smoking status, hypertension status, and postmenopausal menopausal hormone therapy (MHT) status.

Abbreviations: CVD, cardiovascular disease; CHD, coronary heart disease.



**Appendix 13. The associations between age at menopause and incident CVD - after type 2 diabetes was further adjusted in 12 studies**

|        | Age at natural menopause <sup>†</sup> (years) | Adjusted hazard ratio (95% CI) |                                              |                   |                   |
|--------|-----------------------------------------------|--------------------------------|----------------------------------------------|-------------------|-------------------|
|        |                                               | Overall                        | Stratified by age at first CVD event (years) |                   |                   |
|        |                                               |                                | <60                                          | 60-69             | 70+               |
| CVD    | <40                                           | 1.56 (1.39, 1.74)              | 1.88 (1.61, 2.2)                             | 1.35 (1.1, 1.67)  | 1.26 (0.95, 1.67) |
|        | 40-44                                         | 1.31 (1.22, 1.4)               | 1.39 (1.26, 1.54)                            | 1.3 (1.16, 1.47)  | 1.09 (0.93, 1.28) |
|        | 45-49                                         | 1.11 (1.06, 1.17)              | 1.16 (1.07, 1.25)                            | 1.08 (0.98, 1.18) | 1.11 (0.99, 1.24) |
|        | 50-51                                         | 1.0                            | 1.0                                          | 1.0               | 1.0               |
|        | 52-54                                         | 0.96 (0.91, 1.01)              | 0.93 (0.86, 1)                               | 0.98 (0.9, 1.08)  | 1.03 (0.92, 1.16) |
|        | 55+                                           | 0.92 (0.86, 0.97)              | 0.83 (0.76, 0.91)                            | 0.92 (0.84, 1.02) | 0.96 (0.83, 1.1)  |
| CHD    | <40                                           | 1.5 (1.31, 1.71)               | 1.81 (1.5, 2.18)                             | 1.42 (1.12, 1.81) | 1.07 (0.89, 1.29) |
|        | 40-44                                         | 1.3 (1.2, 1.41)                | 1.37 (1.22, 1.55)                            | 1.33 (1.16, 1.53) | 1.04 (0.73, 1.47) |
|        | 45-49                                         | 1.12 (1.06, 1.19)              | 1.19 (1.09, 1.3)                             | 1.1 (0.99, 1.22)  | 1.04 (0.91, 1.19) |
|        | 50-51                                         | 1.0                            | 1.0                                          | 1.0               | 1.0               |
|        | 52-54                                         | 0.97 (0.91, 1.03)              | 0.96 (0.88, 1.05)                            | 0.99 (0.89, 1.1)  | 0.98 (0.85, 1.12) |
|        | 55+                                           | 0.92 (0.86, 0.99)              | 0.88 (0.79, 0.98)                            | 0.95 (0.84, 1.06) | 0.86 (0.73, 1.02) |
| Stroke | <40                                           | 1.74 (1.44, 2.1)               | 1.94 (1.48, 2.55)                            | 1.32 (0.91, 1.92) | 1.94 (1.33, 2.83) |
|        | 40-44                                         | 1.32 (1.17, 1.48)              | 1.44 (1.21, 1.71)                            | 1.22 (0.99, 1.51) | 1.2 (0.93, 1.55)  |
|        | 45-49                                         | 1.08 (0.98, 1.18)              | 1.08 (0.95, 1.24)                            | 1 (0.85, 1.17)    | 1.22 (1.01, 1.46) |
|        | 50-51                                         | 1.0                            | 1.0                                          | 1.0               | 1.0               |
|        | 52-54                                         | 0.93 (0.85, 1.02)              | 0.84 (0.74, 0.96)                            | 0.96 (0.82, 1.12) | 1.14 (0.94, 1.38) |
|        | 55+                                           | 0.9 (0.81, 1)                  | 0.71 (0.61, 0.84)                            | 0.89 (0.75, 1.06) | 1.16 (0.94, 1.44) |

\* Cox proportional-hazards models were used to estimate hazard ratios (HR) and 95% confidence interval (95% CI). All HRs were adjusted for age at last follow up, race/ethnicity, education, body mass index (BMI), smoking status, hypertension status, and postmenopausal menopausal hormone therapy (MHT) status. Abbreviations: CVD, cardiovascular disease; CHD, coronary heart disease.

The research included data from the ALSWH, the University of Newcastle, Australia, and the University of Queensland, Australia. We thank the Australian Government Department of Health for funding and to the women who provided the survey data. HOW was supported by the Queensland University of Technology Early Career Research Grant and the JSPS Grant-in-aid for Scientific Research. The MCCS cohort recruitment was funded by VicHealth and Cancer Council Victoria. The MCCS was further augmented by Australian National Health and Medical Research Council grants 209057, 396414 and 1074383 and by infrastructure provided by Cancer Council Victoria. Cases and their vital status were ascertained through the Victorian Cancer Registry and the Australian Institute of Health and Welfare, including the National Death Index and the Australian Cancer Database. DNC was supported by the National Institute of Public Health, Copenhagen, Denmark. WLH was funded by a grant from the Swedish Research Council (Grant number 521-2011-2955). NSHD has core funding from the UK Medical Research Council (MC UU 12019/1). NCDS is funded by the Economic and Social Research Council. ELSA is funded by the National Institute on Aging (Grants 2RO1AG7644 and 2RO1AG017644-01A1) and a consortium of UK government departments. UKWCS was funded by the World Cancer Research Fund. The Whitehall II study has been supported by grants from the Medical Research Council. SABRE study was supported at baseline by the UK Medical Research Council, Diabetes UK and British Heart Foundation (BHF) and at follow-up by the Wellcome Trust (082464/Z/07/Z) and BHF (SP/07/001/23603, PG/08/103, and PG/12/29/29497). HILO was supported by NIH grant 5 S06 GM08073-26. Baseline survey of the JNHS was supported in part by a Grant-in-Aid for Scientific Research (B: 14370133, 18390195) from the Japan Society for the Promotion of Science, and by the grants from the Japan Menopause Society. This research has been conducted using the UK Biobank resource under application 26629.

SWAN has grant support from the National Institutes of Health (NIH), DHHS, through the National Institute on Aging (NIA), the National Institute of Nursing Research (NINR) and the NIH Office of Research on Women's Health (ORWH) (Grants U01NR004061; U01AG012505, U01AG012535, U01AG012531, U01AG012539, U01AG012546, U01AG012553, U01AG012554, U01AG012495). The content of this article is solely the responsibility of the authors and does not necessarily represent the official views of the NIA, NINR, ORWH or the NIH. Clinical Centers: *University of Michigan, Ann Arbor – Siobán Harlow, PI 2011 – present, MaryFran Sowers, PI 1994-2011; Massachusetts General Hospital, Boston, MA – Joel Finkelstein, PI 1999 – present; Robert Neer, PI 1994 – 1999; Rush University, Rush University Medical Center, Chicago, IL – Howard Kravitz, PI 2009 – present; Lynda Powell, PI 1994 – 2009; University of California, Davis/Kaiser – Ellen Gold, PI; University of California, Los Angeles – Gail Greendale, PI; Albert Einstein College of Medicine, Bronx, NY – Carol Derby, PI 2011 – present, Rachel Wildman, PI 2010 – 2011; Nanette Santoro, PI 2004 – 2010; University of Medicine and Dentistry – New Jersey Medical School, Newark – Gerson Weiss, PI 1994 – 2004; and the University of Pittsburgh, Pittsburgh, PA – Karen Matthews, PI.*

NIH Program Office: *National Institute on Aging, Bethesda, MD – Chhanda Dutta 2016 – present; Winifred Rossi 2012 – 2016; Sherry Sherman 1994 – 2012; Marcia Ory 1994 – 2001; National Institute of Nursing Research, Bethesda, MD – Program Officers.*

Central Laboratory: *University of Michigan, Ann Arbor – Daniel McConnell (Central Ligand Assay Satellite Services).*

Coordinating Center: *University of Pittsburgh, Pittsburgh, PA – Maria Mori Brooks, PI 2012 - present; Kim Sutton-Tyrrell, PI 2001 – 2012; New England Research Institutes, Watertown, MA - Sonja McKinlay, PI 1995 – 2001.*

Steering Committee: Susan Johnson, Current Chair

Chris Gallagher, Former Chair
